# Supplementary material
Source: PubMed Central journal article supplement (PMC6029450)

Figure S1

A

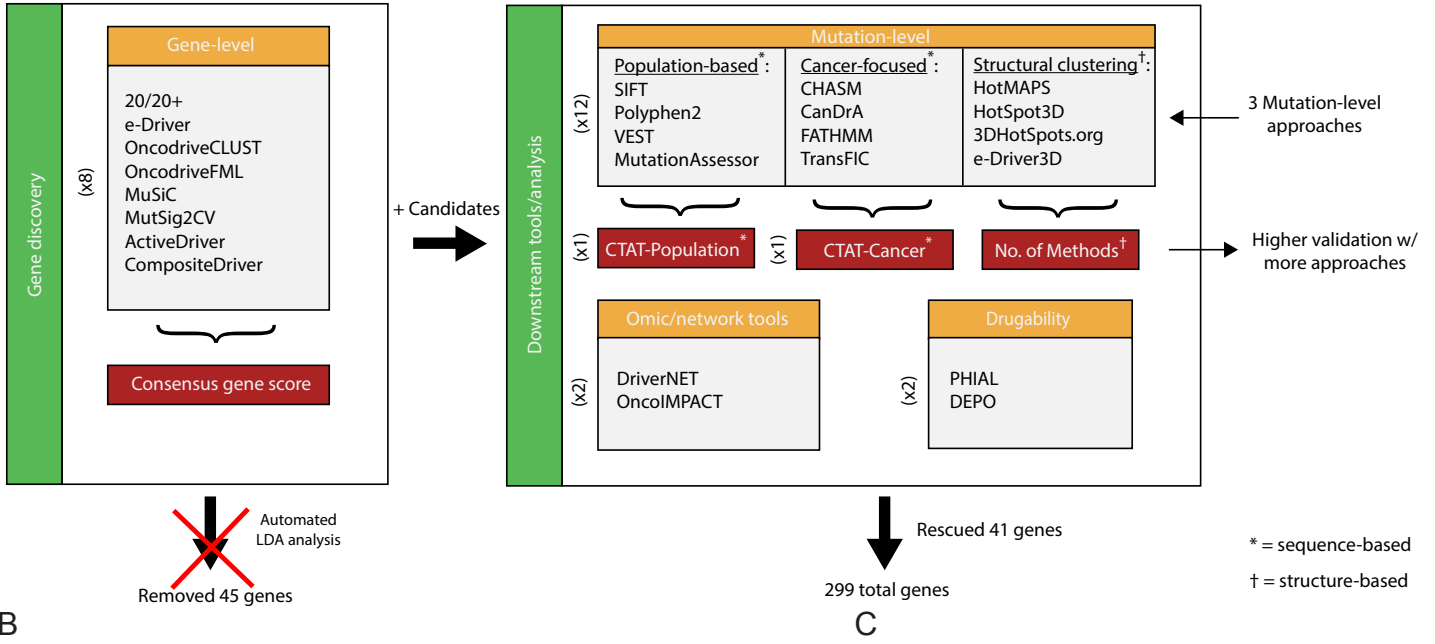

B

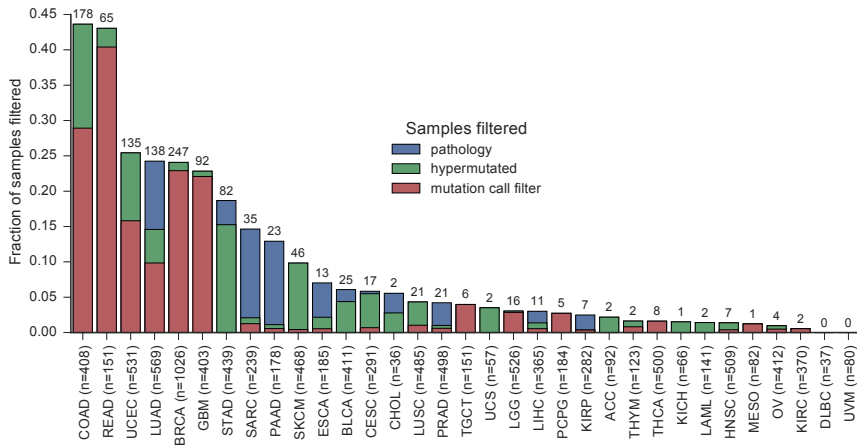

C

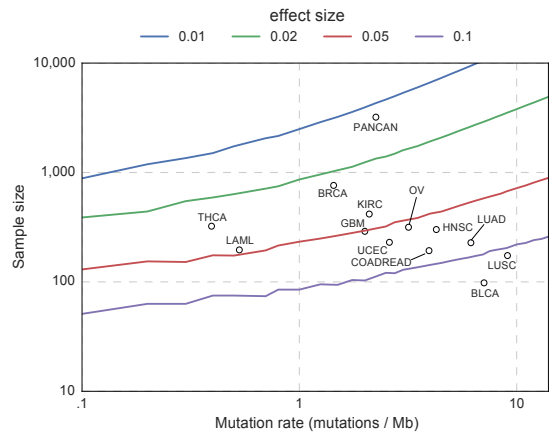

Supplement: NIHMS948705-supplement-1.pdf [file NIHMS948705-supplement-1.pdf]

Figure S2

A

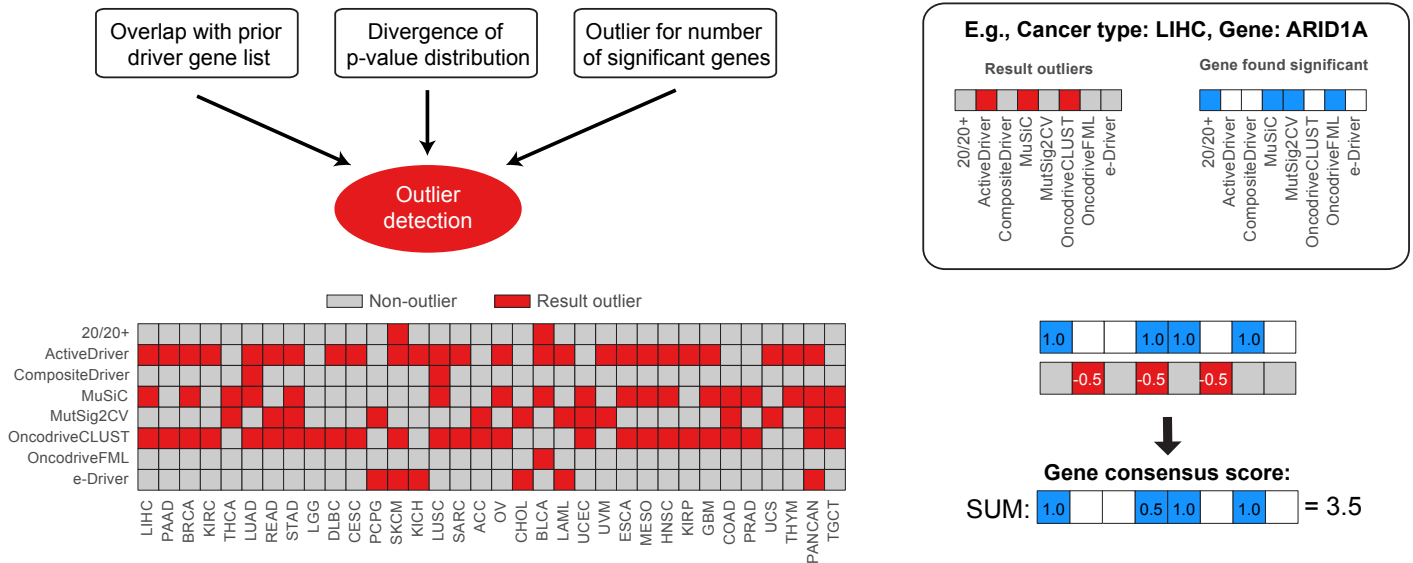

B

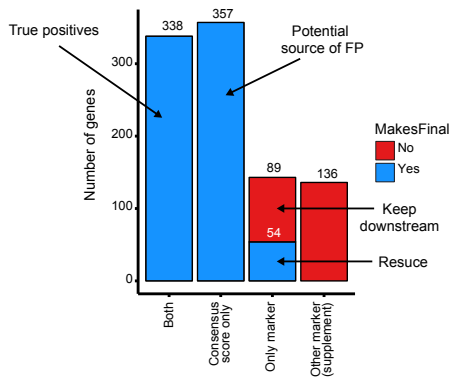

C

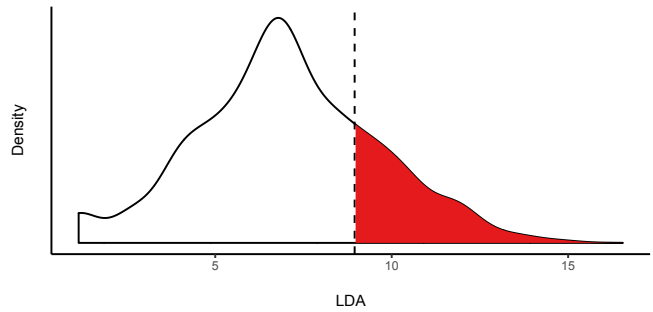

D

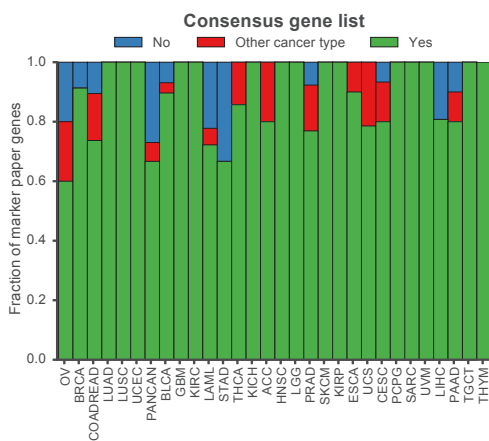

E

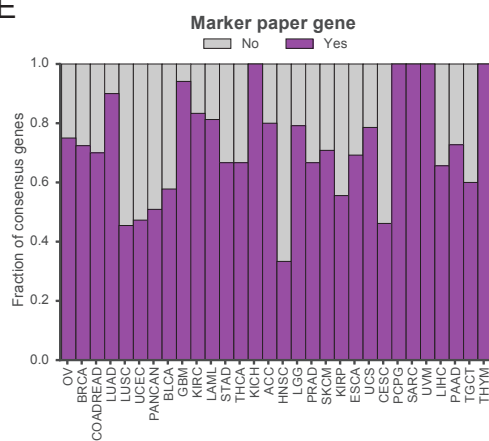

F

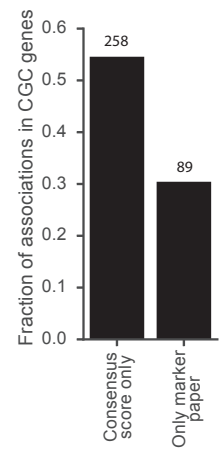

G

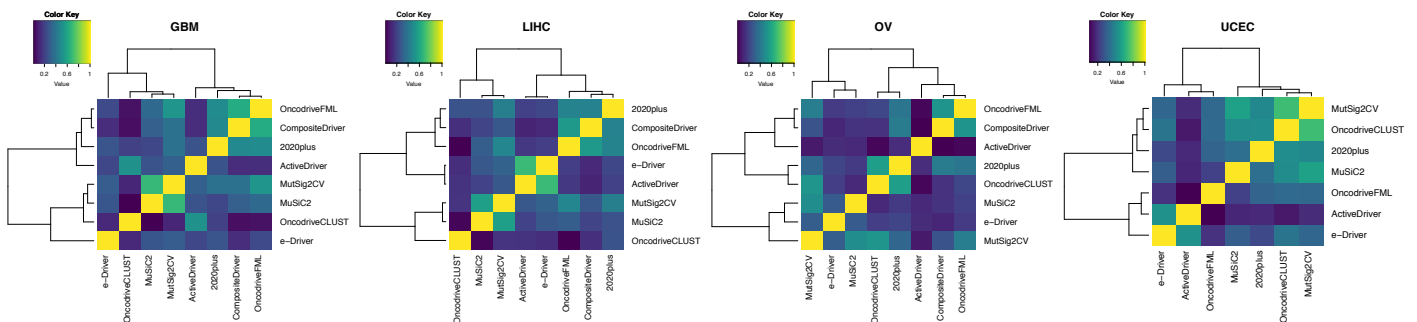

Supplement: NIHMS948705-supplement-2.pdf [file NIHMS948705-supplement-2.pdf]

Figure S3

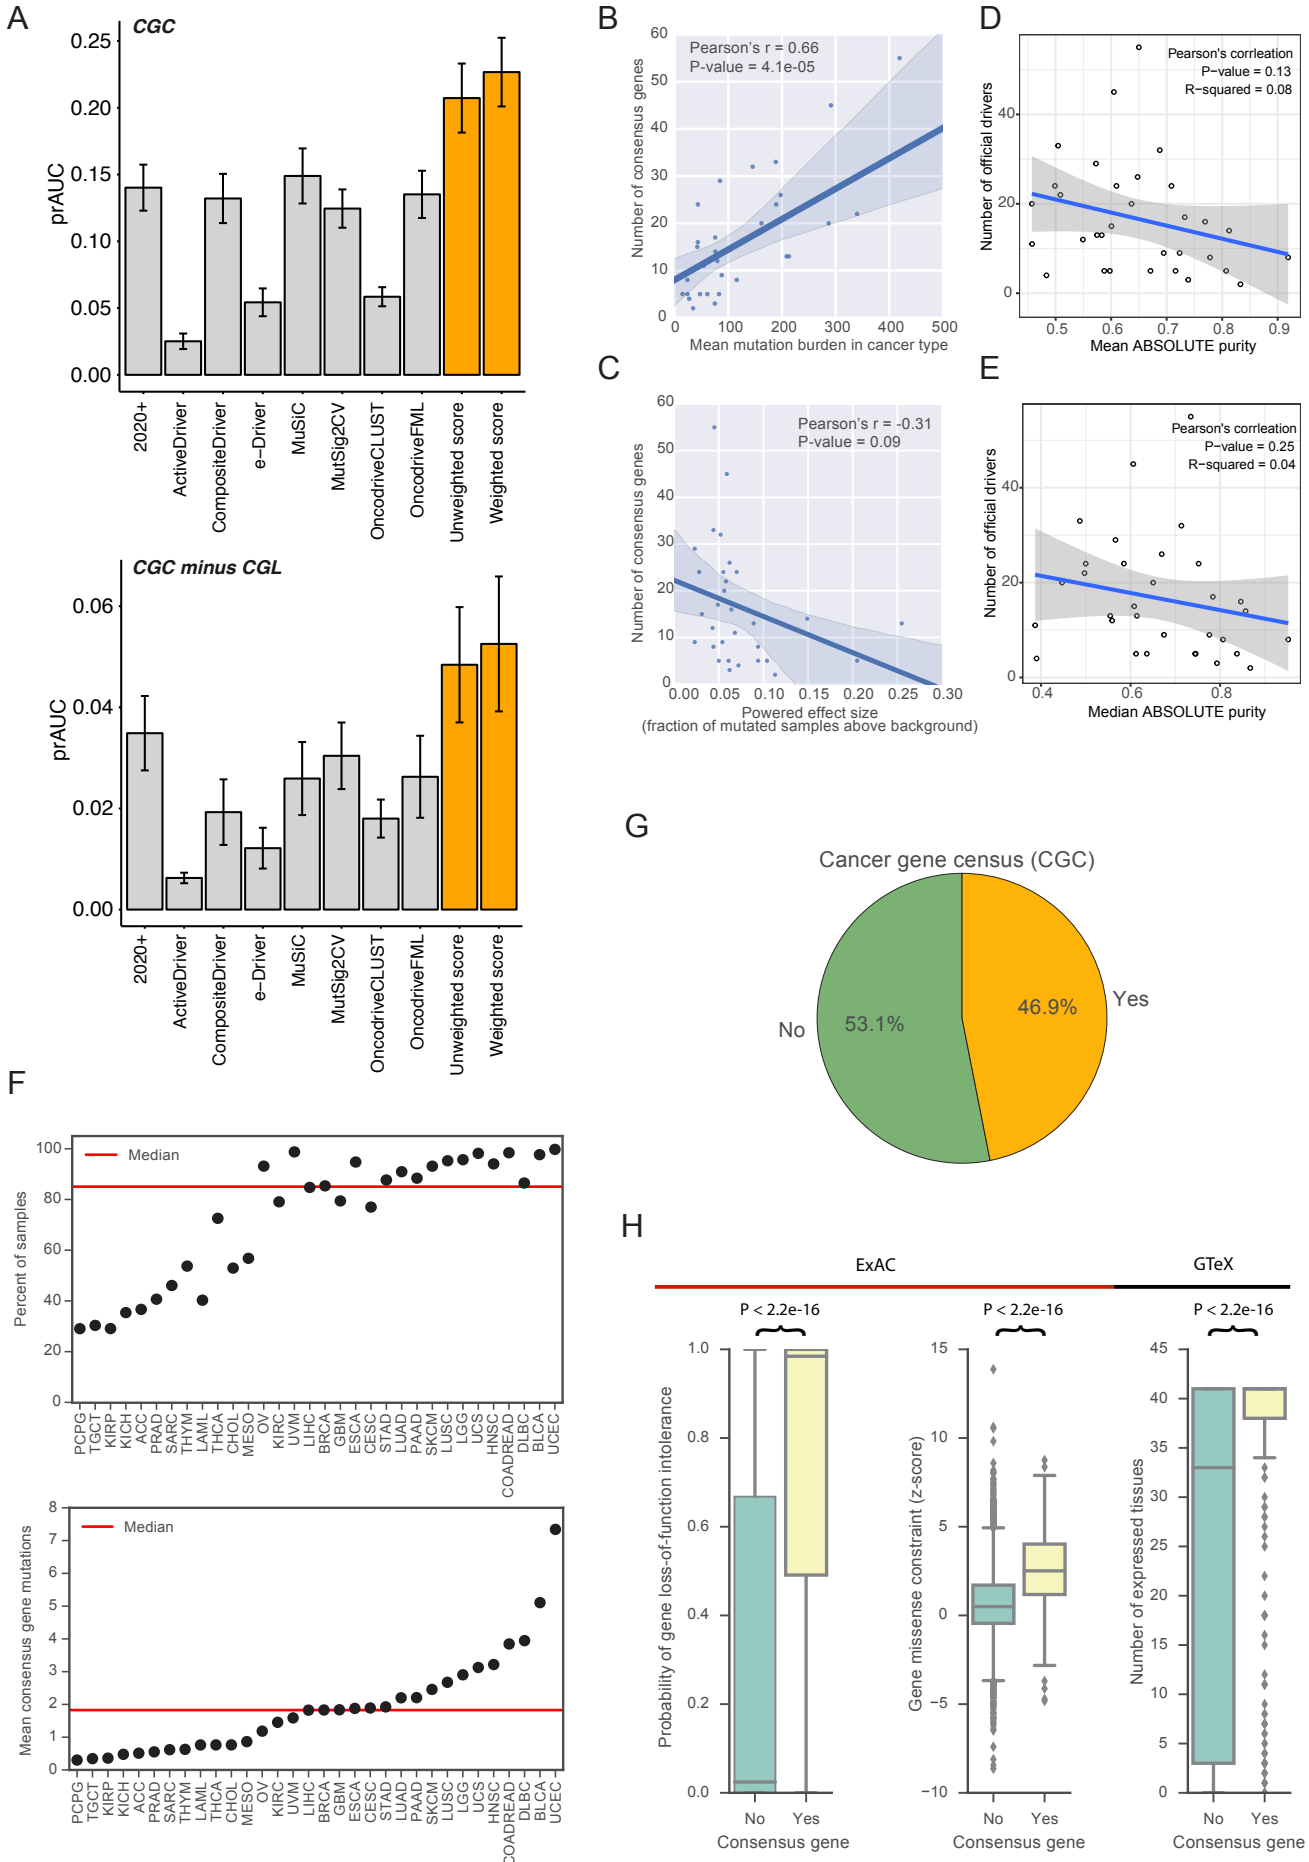

Supplement: NIHMS948705-supplement-3.pdf [file NIHMS948705-supplement-3.pdf]

Figure S5

A

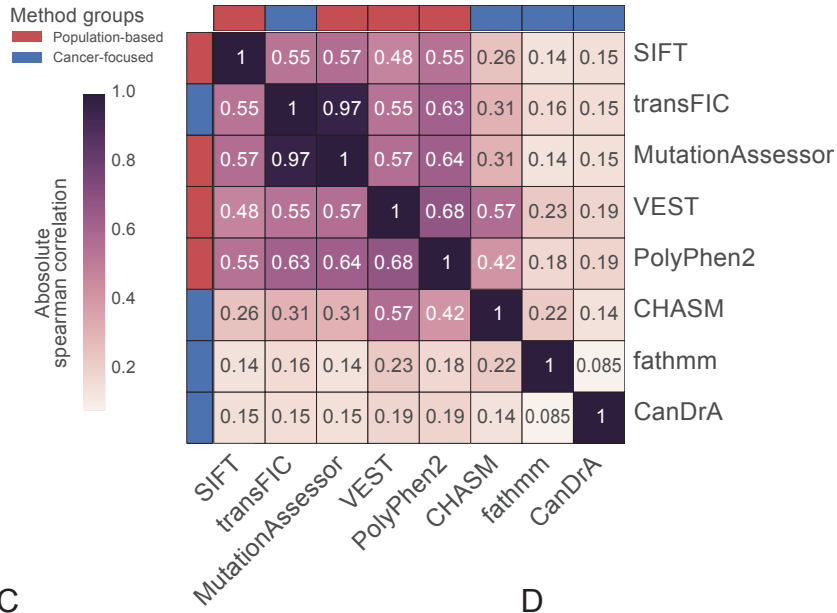

B

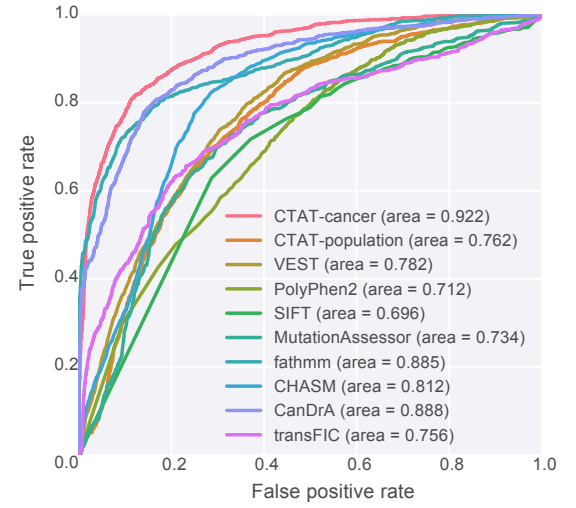

C

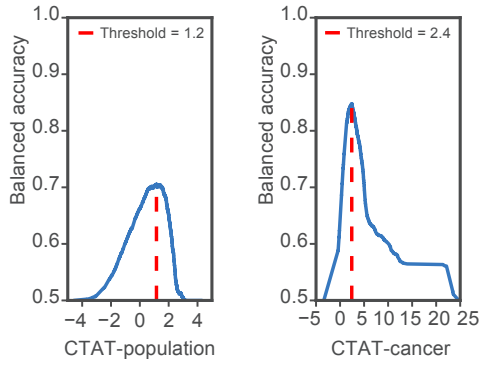

D

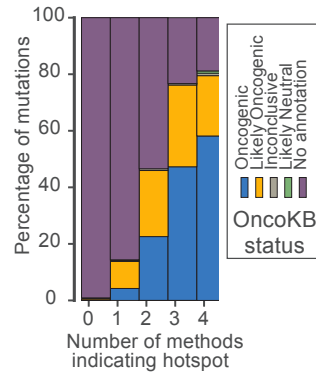

E

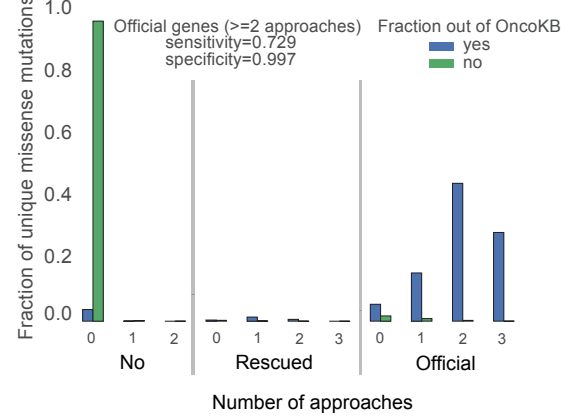

Supplement: NIHMS948705-supplement-5.pdf [file NIHMS948705-supplement-5.pdf]

Figure S6

A

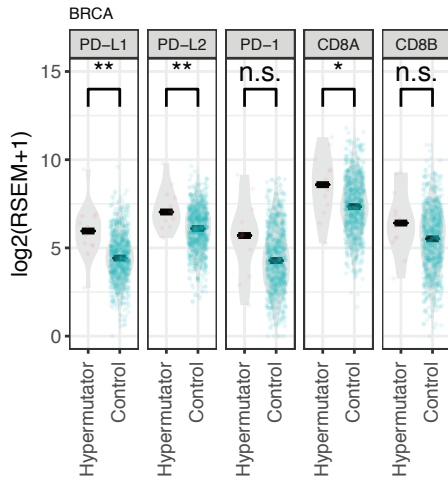

B

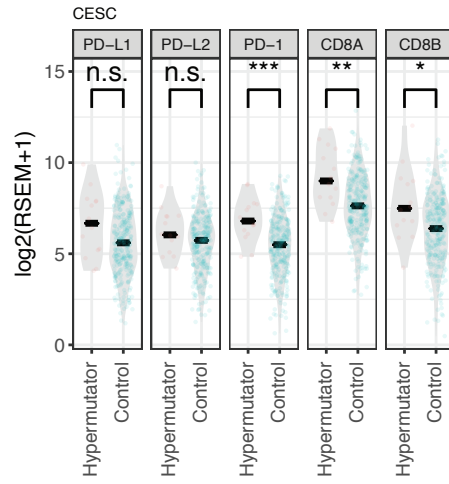

C

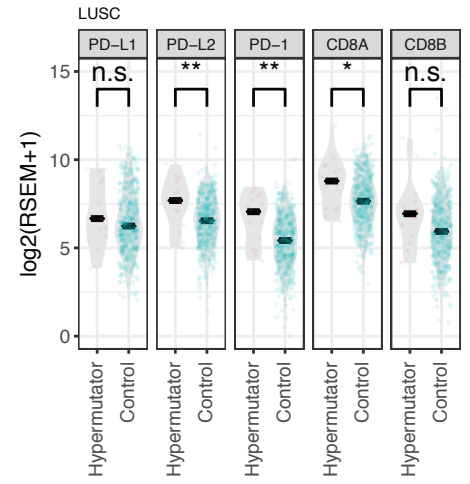

Supplement: NIHMS948705-supplement-6.pdf [file NIHMS948705-supplement-6.pdf]

Figure S7

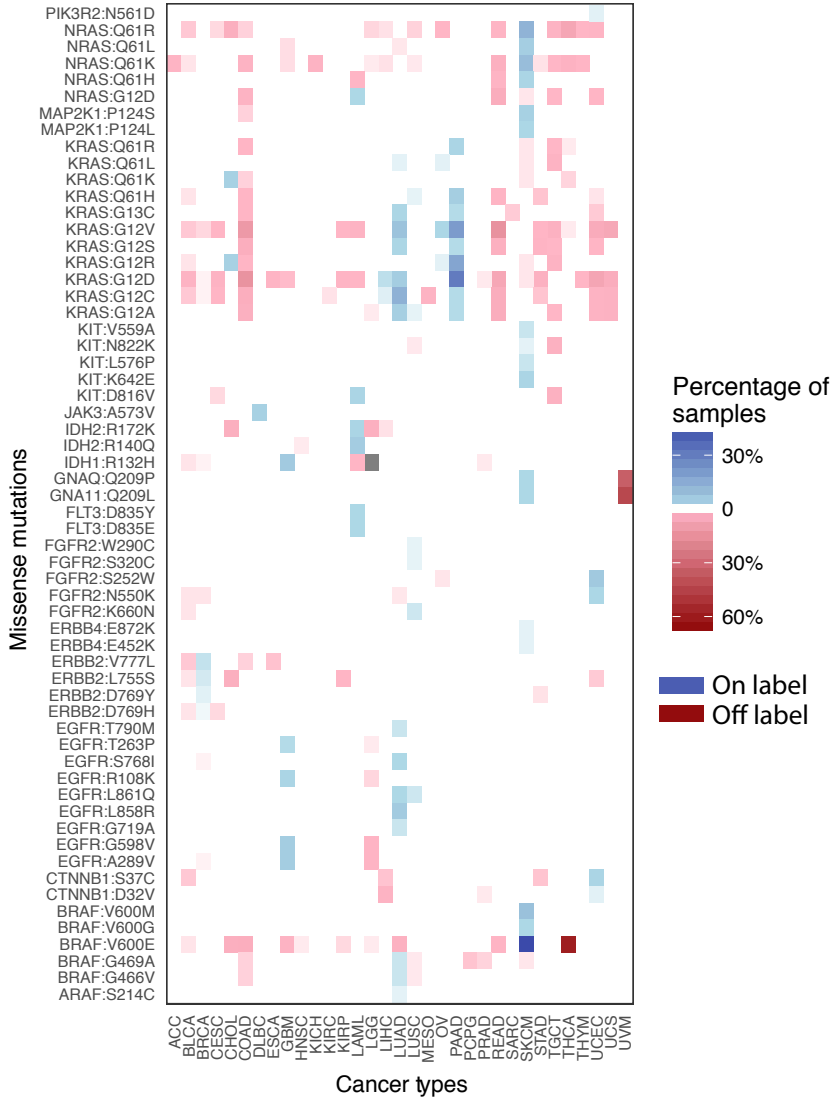

Supplement: NIHMS948705-supplement-7.pdf [file NIHMS948705-supplement-7.pdf]
